# Supplementary material for: HO-1 reduces heat stress-induced apoptosis in bovine granulosa cells by suppressing oxidative stress
Source: publisher site journal article supplement (doi:10.18632/aging.102136), 2019-08-12
Supplement: Supplementary file [file aging-v11i15-102136-supplementary-material-SD2.pdf]

**Supplementary Table S1. Primer sequences for HO-1.**

---

| Genes            | Forward                     | Reverse                     |
|------------------|-----------------------------|-----------------------------|
| siHO-1-1         | 5'-GCUCAACAUCCAGCUGUUUTT-3' | 5'-AAACAGCUGGAUGUUGAGCTT-3' |
| siHO-1-2         | 5'-CCAAGGACCAUGAUCCCUUTT-3' | 5'-AAGGGAUCAUGGUCCUUGGTT-3' |
| siHO-1-3         | 5'-GCAGCAAGGUGCAAGACUUTT-3' | 5'-AAGUCUUGCACCUUGCUGCTT-3' |
| siHO-1-4         | 5'-GGUCCUCACACUCAGCUUUTT-3' | 5'-AAAGCUGAGUGAGGACCTT-3'   |
| Negative control | 5'-UUCUCCGAACGUGUCACGUTT-3' | 5'-ACGUGACACGUUCGGAGAATT-3' |

---
